# Supplementary material
Source: PubMed Central journal article supplement (PMC6124522)

# Supplementary Fig. 1

|             |   |    |    |
|-------------|---|----|----|
| LPS (mg/kg) | - | 10 | 10 |
| T53 (mg/kg) | - | -  | 1  |

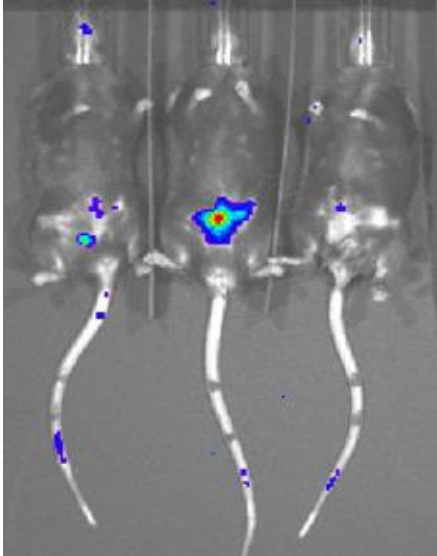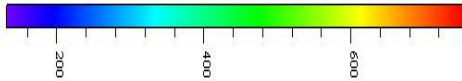

Radiance  
(photons/sec/cm<sup>2</sup>/sr)

# Supplementary Fig. 2

**A**

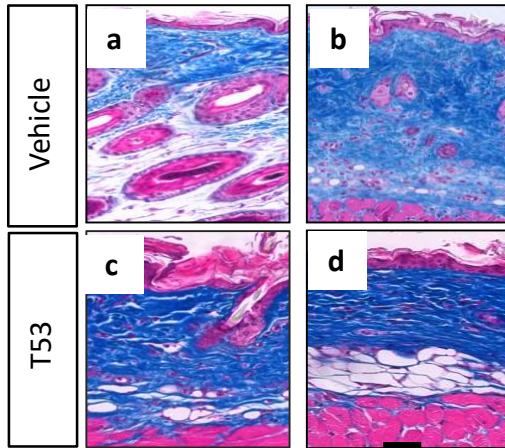

**B**

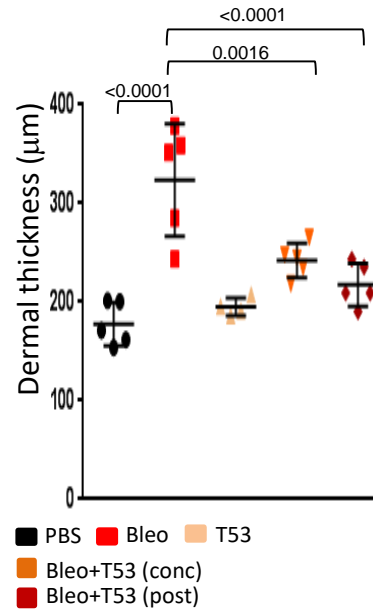

**C**

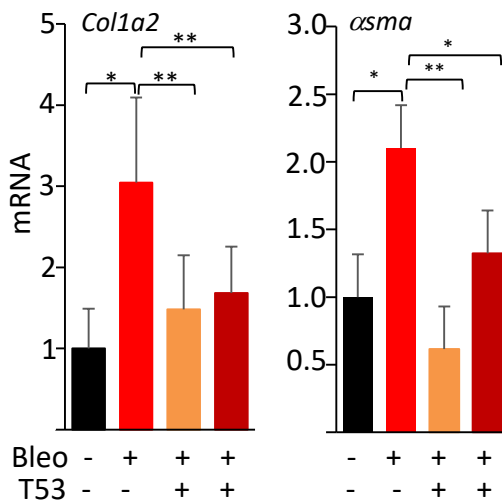

**D**

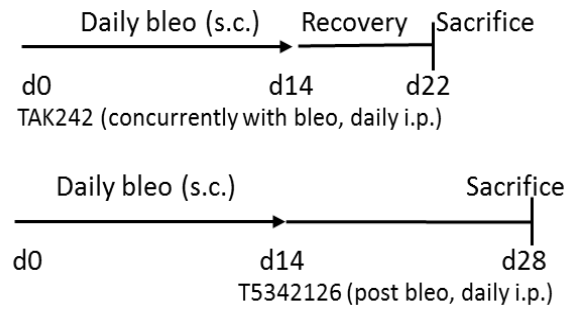

# Supplementary Fig. 3

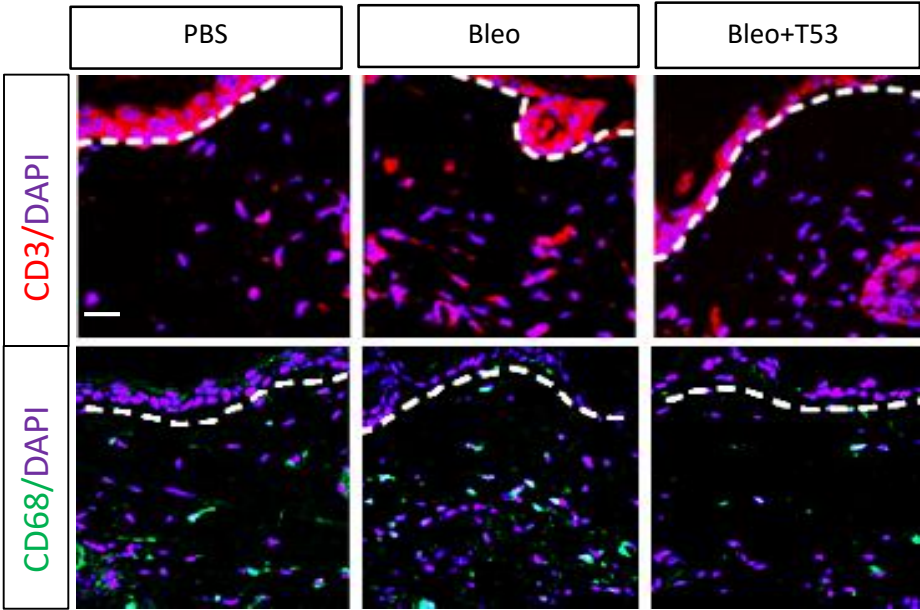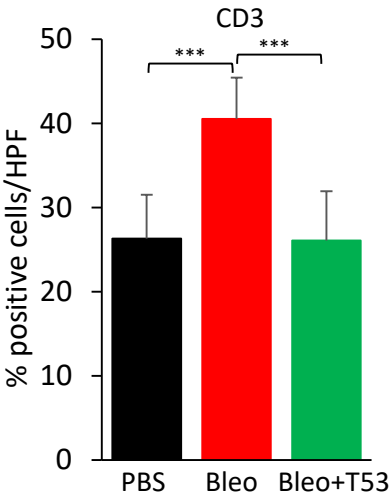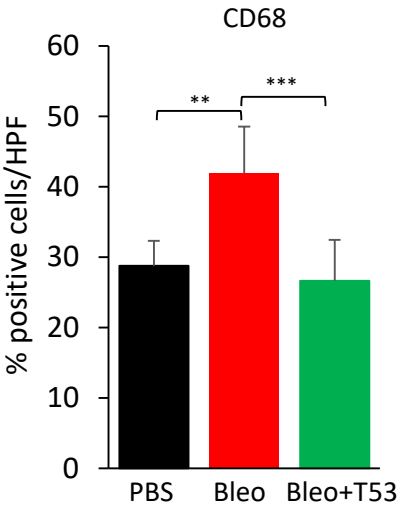

# Supplementary Fig. 4

A

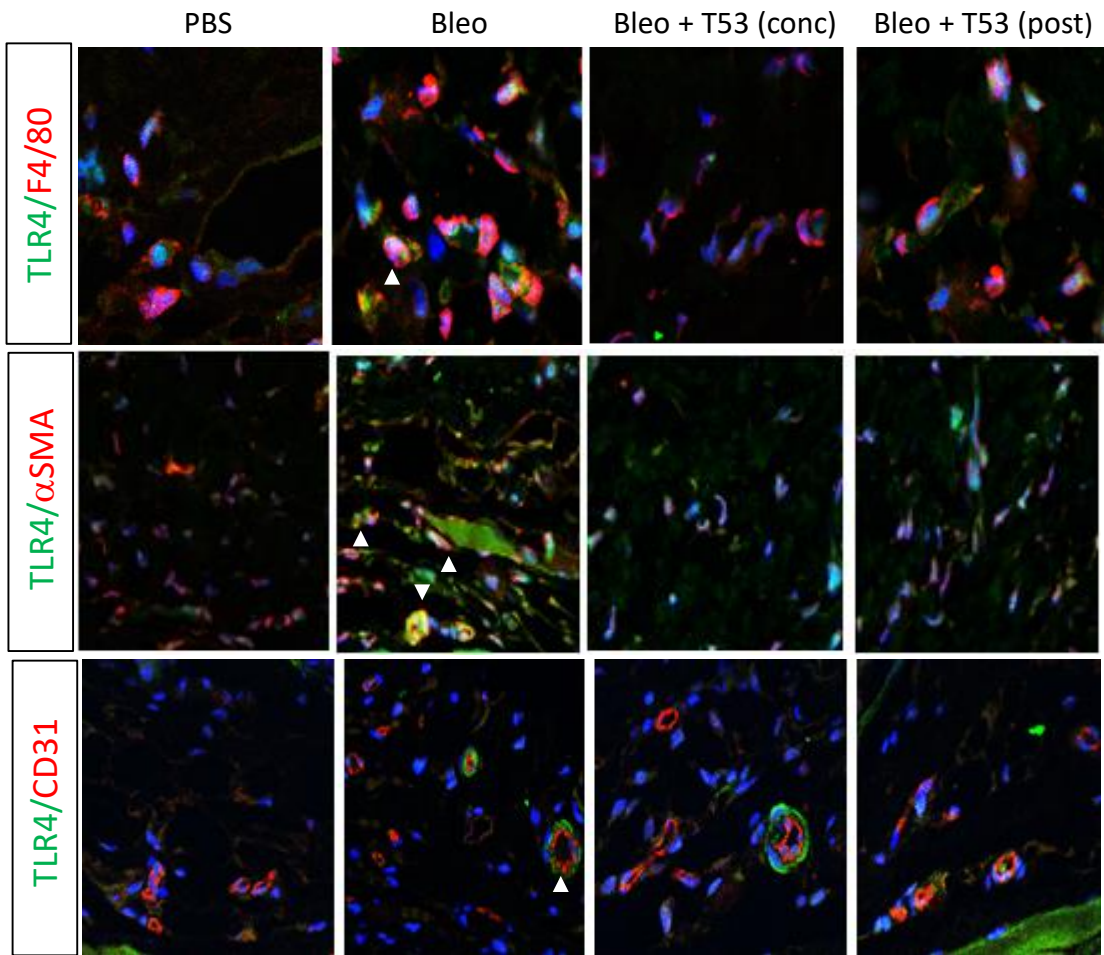

B

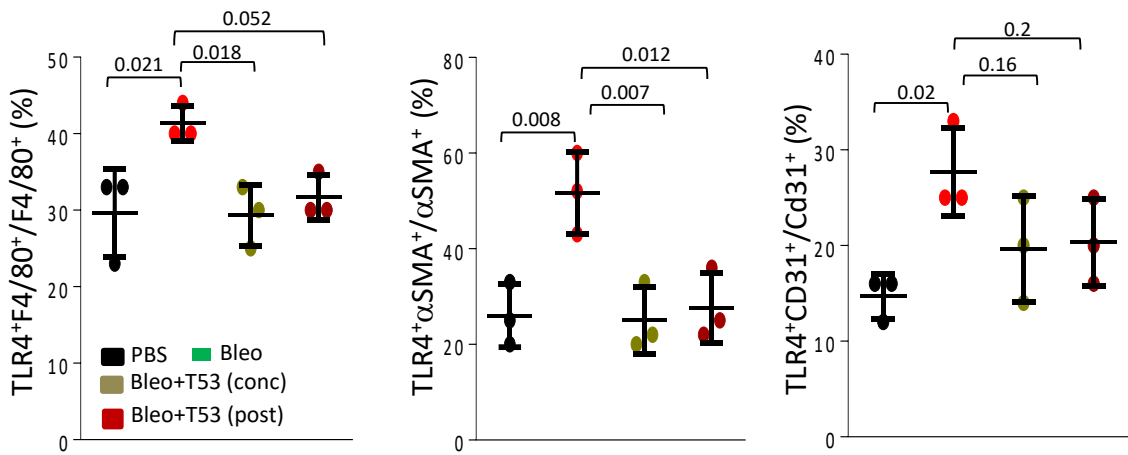

# Supplementary Fig. 5

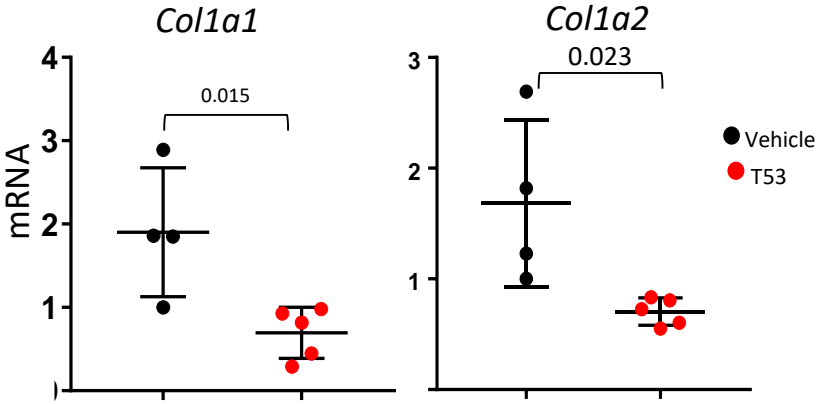

# Supplementary Fig. 6

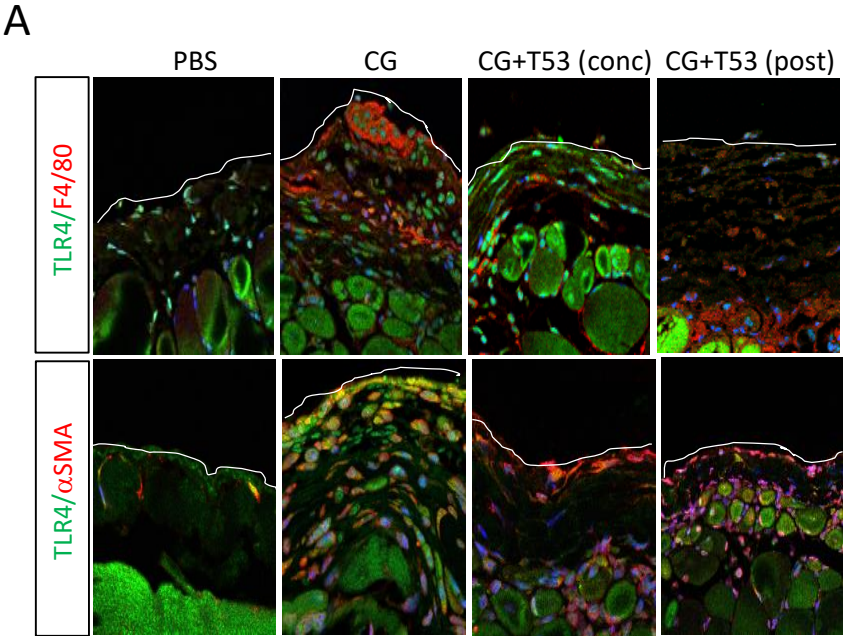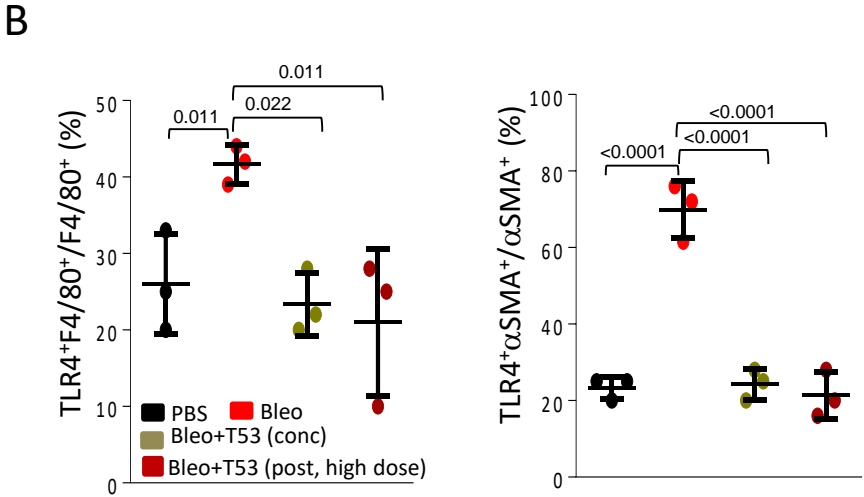

# Supplemental Fig. 7

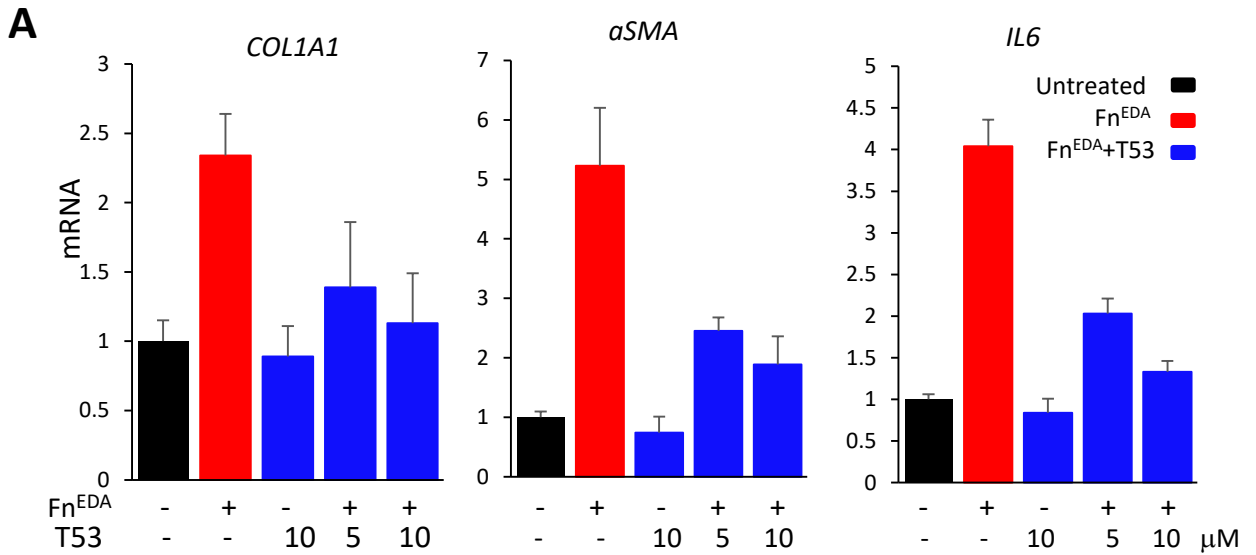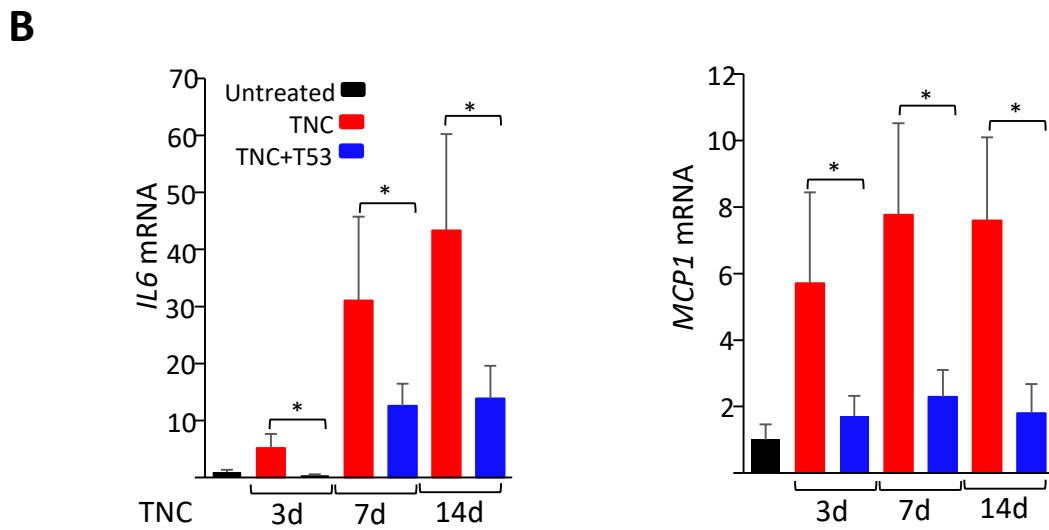

# Supplementary Fig. 8

**A**

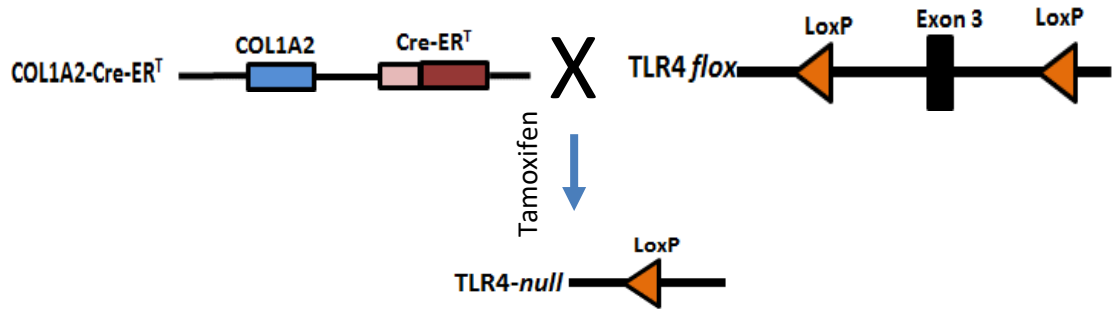

**B**

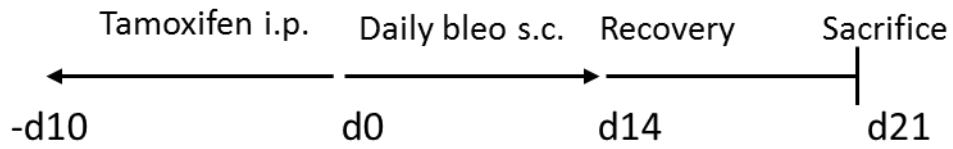

**C**

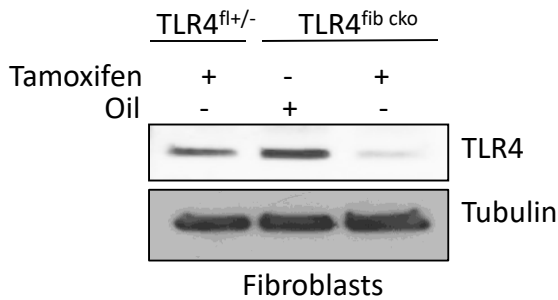

**D**

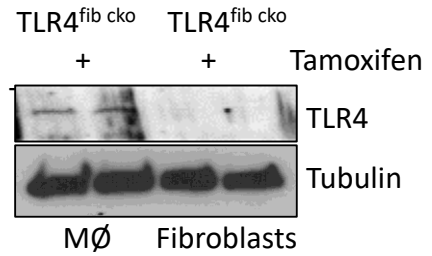



# Supplemental Fig. 9

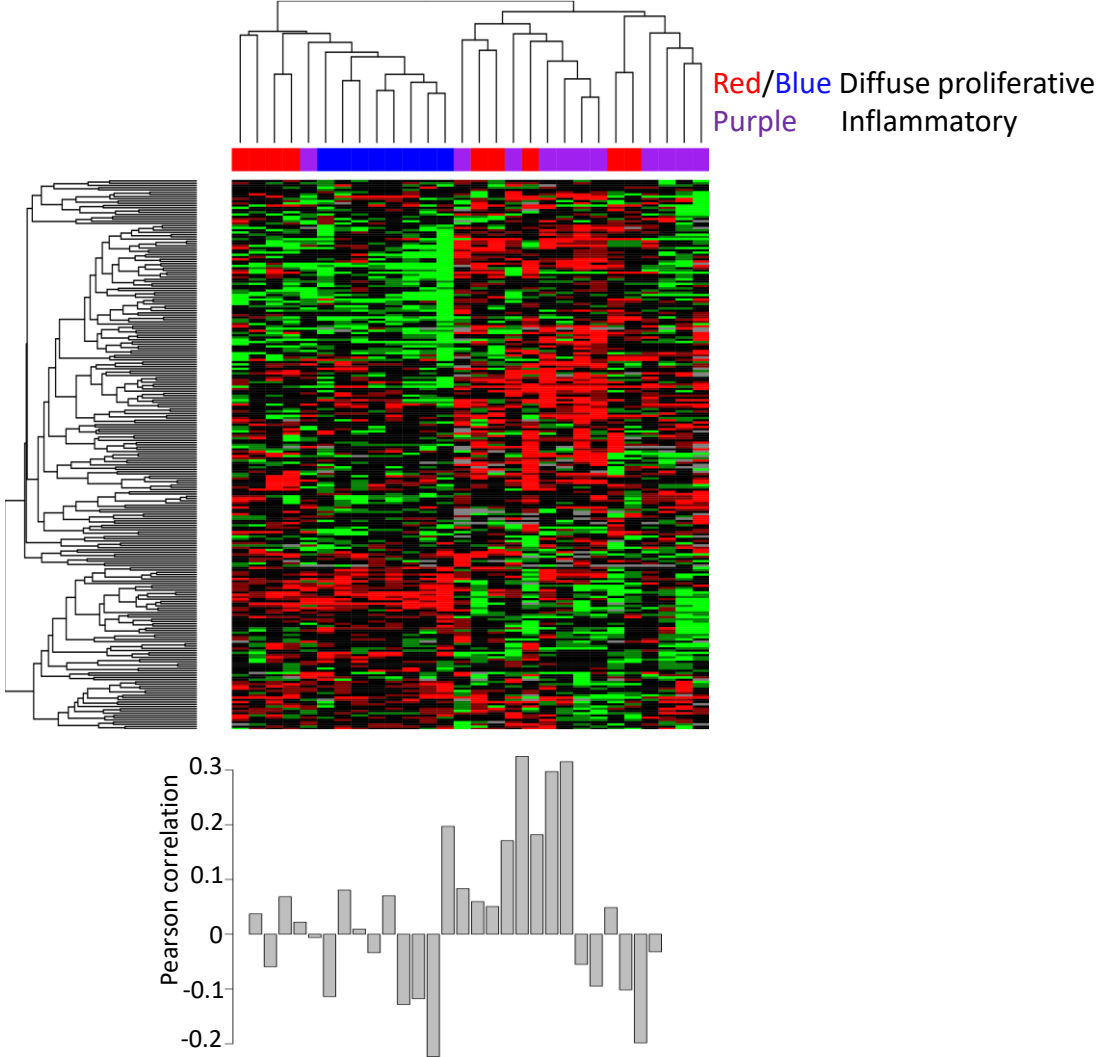

Supplement: jciinsight-3-98850-s151.pdf [file jciinsight-3-98850-s151.pdf]
